# Supplementary material
Source: publisher site journal article supplement (https://www.dovepress.com/article/267809)
Supplement: Supplementary file 1 [file get_supplementary_file.php]

## Supplementary Figures

### Molecular Characterization of Hepatitis C Virus for Developed Antiviral Agents Resistance Mutations and New Insights into In-Silico Prediction Studies

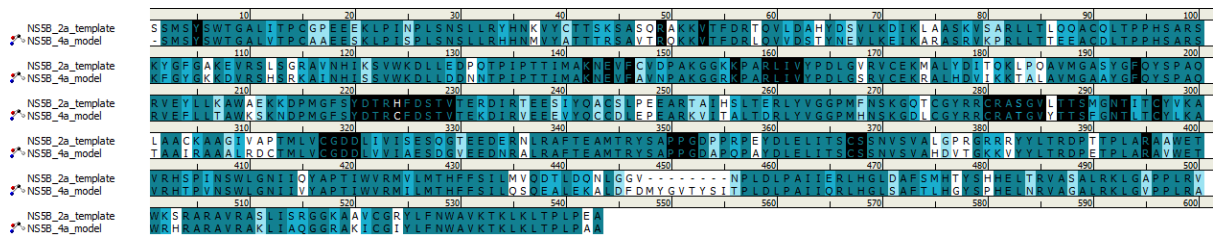

**Supplementary Figure 1** Sequence alignment of template sequence (PDB ID: 4WTA, HCV genotype 2a) and model sequence (Uniprot entry O39929). Amino acids colored based on similarity. Residues within 8 Å of the nucleotide binding site are highlighted in black. Image prepared using BIOVIA Discovery Studio

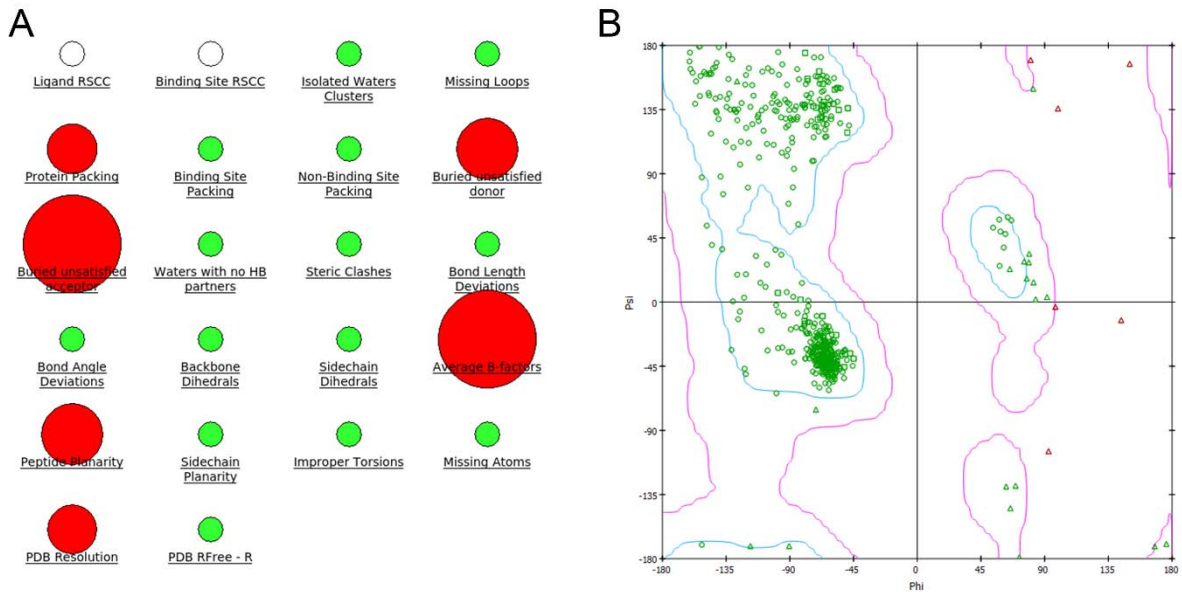

**Supplementary Figure 2** The 4WTA template structure quality report. A) Template Protein Reliability Report; B) Template Ramachandran Plot

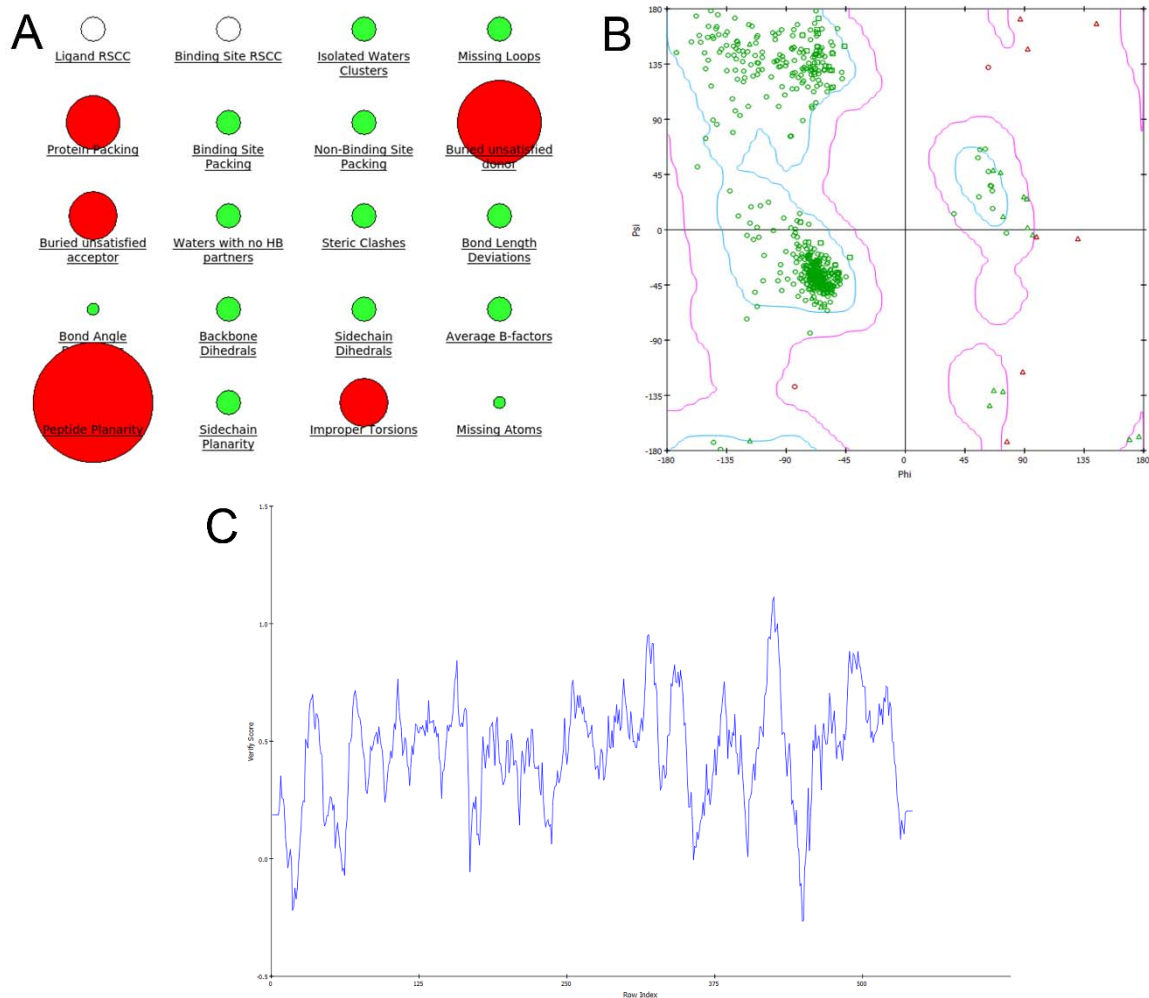

**Supplementary Figure 3** HCV genotype 4a NS5B homology model quality report. A) Protein Reliability Report; B) Homology Model Ramachandran Plot; C) Profile-3D scores for homology model residues
